# Supplementary material for: Reconstructing the transmission dynamics of varicella in Japan: an elevation of age at infection
Source: PeerJ. 2022 Jan 19;10:e12767. doi: 10.7717/peerj.12767 (PMC8783564; doi:10.7717/peerj.12767)
Supplement: Supplemental Information 3 — Sentinel-based surveillance data in Japan from 1990–2019. [file peerj-10-12767-s003.xlsx]

## Sheet: Sheet1
	Age0-1	Age2	Age3	Age4	Age5-9	Age10-114	Birth
1990	43314	29378	31064	31551	42230	3570	1221585
1991	56393	38331	41418	39737	55454	4792	1223245
1992	53733	34280	38599	37401	51021	4567	1208989
1993	48014	30158	31400	30474	40802	3724	1188282
1994	47519	29939	29977	27970	37444	3244	1238328
1995	50635	31863	33459	29614	35534	3115	1187064
1996	51052	32928	33305	30621	36946	3324	1206555
1997	50585	32473	32182	29814	35694	3269	1191665
1998	45081	28232	27961	24996	32223	2469	1203147
1999	46940	28703	28302	24365	30415	2271	1177669
2000	76923	48670	47138	41236	54956	3802	1190547
2001	73757	48384	46121	41652	55471	3861	1170662
2002	72602	47070	45855	40327	51874	3597	1153855
2003	68207	46315	43542	37864	49252	3560	1123610
2004	66579	45426	42611	36633	49358	3488	1110721
2005	65204	44062	43032	36891	48011	3426	1062530
2006	69090	47923	46789	40850	55221	3750	1092674
2007	65960	44122	42387	37025	50714	3863	1089818
2008	60808	40850	38199	33649	46259	3519	1091156
2009	54901	38659	34462	29477	40790	3143	1070036
2010	58287	43501	41761	35481	50553	3614	1071305
2011	58767	43125	41019	36946	53300	4102	1050807
2012	45799	34496	33689	30064	46727	3692	1037232
2013	39329	30412	29830	26806	43966	3599	1029817
2014	31897	24602	26818	24827	44543	3903	1003609
2015	12204	7975	9302	12014	31842	3492	1005721
2016	8810	4588	6114	9248	31997	3862	977242
2017	7649	3893	5108	6912	31064	4737	946146
2018	5720	2942	4169	5868	30273	5610	918400
2019	5630	2664	3578	5294	31777	6961	865239
