# Supplementary material for: Reconstructing the transmission dynamics of varicella in Japan: an elevation of age at infection
Source: PeerJ. 2022 Jan 19;10:e12767. doi: 10.7717/peerj.12767 (PMC8783564; doi:10.7717/peerj.12767)
Supplement: Supplemental Information 4 — Recorded yearly number of birth in Japan from 1990–2019. [file peerj-10-12767-s004.xlsx]

## Sheet: Sheet1
	#Newborn
1990	1221585
1991	1223245
1992	1208989
1993	1188282
1994	1238328
1995	1187064
1996	1206555
1997	1191665
1998	1203147
1999	1177669
2000	1190547
2001	1170662
2002	1153855
2003	1123610
2004	1110721
2005	1062530
2006	1092674
2007	1089818
2008	1091156
2009	1070036
2010	1071305
2011	1050807
2012	1037232
2013	1029817
2014	1003609
2015	1005721
2016	977242
2017	946146
2018	918400
2019	865239
